# Supplementary material for: Identification of a transcription factor, PunR, that regulates the purine and purine nucleoside transporter punC in E. coli
Source: PubMed Central journal article supplement (PMC8376909; doi:10.1038/s42003-021-02516-0), 2021-08-19
Supplement: 42003_2021_2516_MOESM1_ESM.pdf [file 42003_2021_2516_MOESM1_ESM.pdf]

## Supplementary Table and Figures

**Supplementary Table 1.** The ChIP-exo detected the PunR occupied an ~200 bp region in the promoter/ intergenic region for the listed genes.

**Supplementary data.** RNA-Seq measured differentially expressed genes in the presence and absence of 2.5 mM adenosine compared for *E. coli* MG1655 wild type strain.

**Supplementary Figure 1. The genome context analysis of the *ydhC-ydhB* genes.** Orthologous genes are marked by arrows of the same color and labeled according to their functional annotations: 3-PunC (YdhC), 1-PunR (YdhB), 2-PurR (purine nucleotide synthesis repressor).

**Supplementary Figure 2. Multiple alignments of intergenic regions of the *ydhC/ydhB* genes in various groups of Enterobacteria and *Pseudomonas* spp.** Gene coding regions are shown in red capital letters. Location of predicted PunR binding site is highlighted in yellow. The predicted -35 and -10 promoter elements of *punC* are underlined.

**Supplementary Figure 3. The EMSA binding assay for PunR.** The fluorescently labelled DNA pre-incubated for 1 hour with PunR and separated on 6% polyacrylamide gel. The lines -1, 2, 3 represent 1.5, 0.8, 0 microM of PunR incubated with the negative control – GguR- regulator fluorescently labelled DNA sequence in the presence of 1mM adenine. The lines 4, 5, 6, 7 represent PunR-predicted labelled DNA sequence incubated with PunR -0, 0.4, 0.8 and 1.5 microM in the presence of 1 mM adenine and lines 8, 9, 10 are PunR pre-incubated with the predicted PunR DNA-binding site at the 1, 0.5, 0 microM in the presence of 10 mM adenine. The Tris-Glycine running buffer, pH 8 supplemented with 0.25 mM adenine.

**Supplementary Figure 4. The phenotypes of the *E. coli* BW25113 and *punC* knockout strains** in the Biolog plate PM1 using M9 medium (PM1- carbon sources). The Omnilog measured growth curves for *E. coli* BW25113 and *punC* knockout strains on 2-deoxy-adenosine, adenosine, D-glucose, D-sorbitol, D-glucuronate, D-xylose. The Biolog plate PM1 contains 95 different carbon sources: L-arabinose, N-acetyl-D-glucosamine, D-saccharic acid, succinate, D-galactose, L-aspartate, L-proline, D-alanine, D-trehalose, D-mannose, dulcitol, D-serine, D-sorbitol, glycerol, L-fucose, D-glucuronate, D-gluconate, D,L-glycerol-phosphate, D-xylose, L-lactate, formate, D-mannitol, L-glutamate, D-glucose-phosphate, D-galactonate-lactone, D,L-malate, D-ribose, Tween 20, L-rhamnose, D-fructose, acetate, D-glucose, maltose, melibiose, thymidine, L-asparagine, D-aspartate, D-glucosaminic acid, 1,2-propandiol, Tween 40,  $\alpha$ -keto-glutarate,  $\alpha$ -keto-butyrate,  $\alpha$ -Methyl-galactoside, D-lactose, lactulose, sucrose, uridine, L-glutamine, m-Tartrate, D-glucose-1-phosphate, D-fructose-6-phosphate, Tween 80,  $\alpha$ -hydroxy-glutarate-lactone,  $\alpha$ -hydroxy-butyrate,  $\beta$ -methyl-D-glucoside, adonitol, maltotriose, 2-Deoxy-adenosine, adenosine, glycyl-L-aspartate, citrate, Myo-inositol, D-threonine, fumarate, bromo-succinate, propionate, mucic acid, glycolate, glyoxylate, D-cellobiose, inosine, glycyl-L-glutamate, tricarballylate, L-serine, L-threonine, L-alanine, L-alanyl-glycine, acetoacetate, N-acetyl-D-mannosamine, mono-methyl-succinate, methyl-pyruvate, D-malate, L-malate, glycyl-L-proline, p-hydroxy-phenylacetate, m-hydroxy-phenylacetate, tyramine, D-psicose, L-lyxose, glucuronamide, pyruvate, L-galactonate- $\gamma$ -lactone, D-galacturonate, phenylethylamine, 2-aminoethanol.



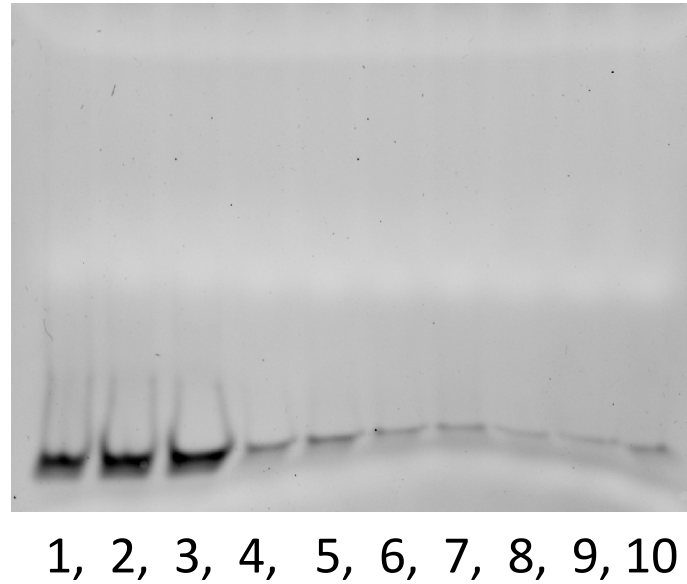

**Fig S3.** The EMSA assay for the fluorescently labeled DNA pre-incubated 1 hour with PunR and separated on 6% polyacrylamide gel. The lines -1, 2, 3 represent 1.5, 0.8, 0 microM of PunR pre-incubated 1 hour with the negative control - GguR labeled DNA GTTGT(A/C)N(G/T)ACAAC from (Ref) in the presence of 1mM adenine . The lines 4, 5, 6, 7 represent pre-incubated PunR-predicted labeled DNA with PunR-0, 0.4, 0.8 and 1.5 microM in the presence of 1 mM adenine and lines 8, 9, 10 are PunR pre-incubated with the predicted DNA-binding site at the 1, 0.5, 0 microM in the presence of 10 mM adenine. The Tris-Glycine running buffer contains 0.25 mM adenine.

*ydhC* knockout strain

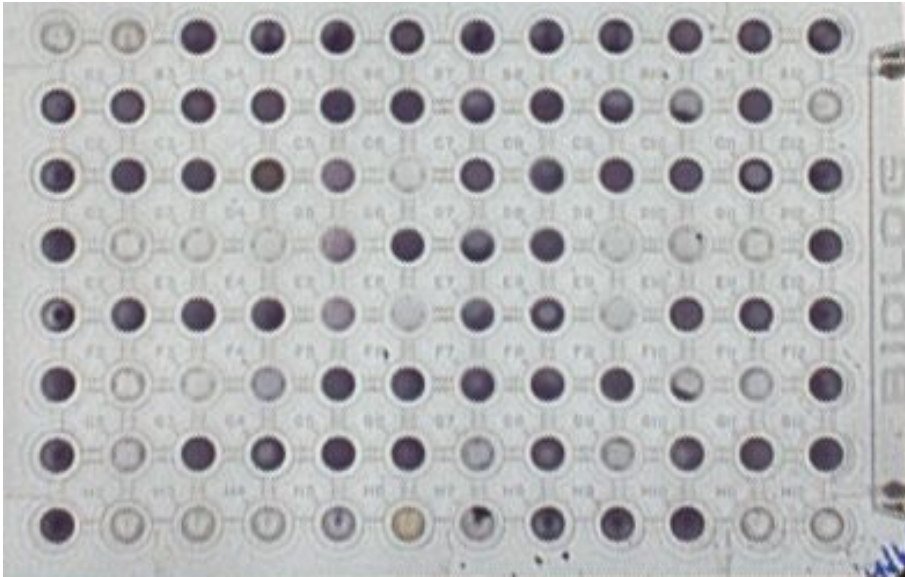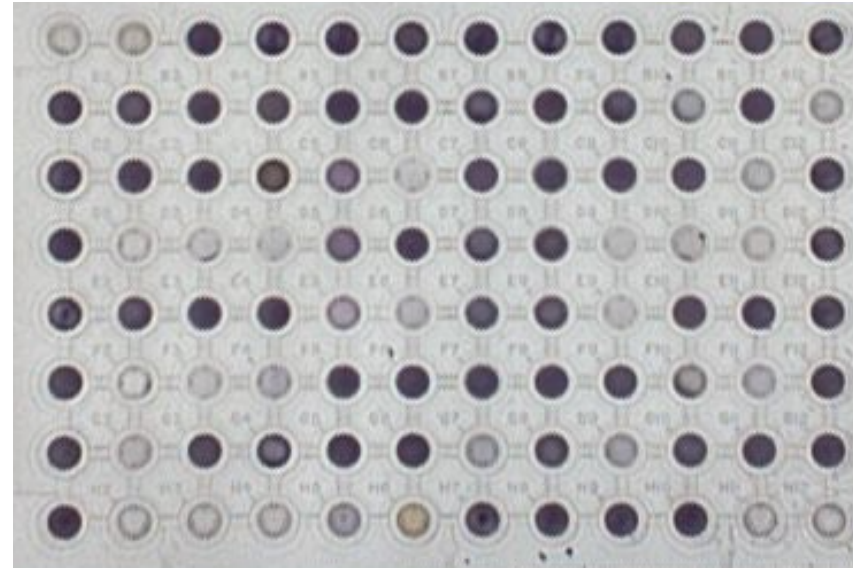

Fig. S4 The phenotype of the *E. coli* BW25113 NC and *punC* knockout strains in PM1.

| b_number | The nearest gene |
|----------|------------------|
| b0591    | fepD             |
| b1200    | dhaR             |
| b1241    | adhE             |
| b1499    | ydeO             |
| b1521    | uxaB             |
| b1638    | pdxH             |
| b1658    | purR             |
| b1659    | ydhB             |
| b1844    | exoX             |
| b2448    | yffQ             |
| b2632    | yfjP             |
| b2956    | yggM             |
| b3092    | uxaC             |
| b3175    | secG             |
| b3321    | rpsJ             |

Table S1. The ChIP-exo detected the PunR occupied an 200bp region in the promoter/intergenic. Region for the listed genes.





- 548.115.peg.1014 Enterobacter aerogenes strain CAV1320
- 883121.3.peg.2572 Klebsiella oxytoca 10-5246
- 1286170.3.peg.1018 Raoultella ornithinolytica B6
- 575.4.peg.1602 Raoultella planticola strain CHB
- 640131.3.peg.2253 Klebsiella variicola At-22
- 1134687.3.peg.2478 Klebsiella michiganensis strain SA2
- 701347.4.peg.2203 Enterobacter cloacae SCF1
- 1697388.3.peg.3561 Enterobacter tabaci strain CCUG 72520
- 290338.8.peg.1409 Citrobacter koseri ATCC BAA-895
- 546.84.peg.3727 Citrobacter freundii strain FDAARGOS\_61
- 500640.5.peg.1436 Citrobacter youngae ATCC 29220
- 67829.4.peg.3727 Citrobacter murlinae strain P080C CL
- 295319.15.peg.1525 Salmonella enterica subsp. enterica serovar Paratyphi A str. ATCC 9150
- 12149.1.peg.1388 Salmonella bongori 12149
- 1095768.3.peg.1306 Enterobacter sp. JC163

ydhC <-

-10

ATCCTTTTACCAGGTTGCATcgtcatttctcatt-ctcgttgcagggttccagttcagtcgccgcagagtgtag  
 ATCCTTTTCTGGGTTGCATtgttttattctcct-gaggaggcagggttacgt-----tggcgcagagtgtag  
 ATCCTTTTCCCAGGTTGTTGCATaacgttctcttctactgatgcaggatga-----tgccgcagagtgtag  
 ATCCTTTTCCCAGGTTGTTGCATaacgttctcttctactgatgcaggatga-----tgccgcagagtgtag  
 ATCCTTTTCCCAGGTTGTTGCATaacattctctt---ataggtgcaggatga-----tgccgcagagtgtag  
 ATCCTTTTCCCAGGTTGTTGCATaacattctctt---ataggtgcaggatga-----tgccgcagagtgtag  
 ATCCTTTTCCCAGGTTGTTGCATaacattctctt---atagatgcaggatga-----tgccgcagagtgtag  
 ATCCTTTTCCCAGGTTGTTGCATaacgttctcatttttggagtagcaggatga-----tgccgcagagtgtag  
 ATCCTTTTCCCAGGTTGTTGCATaacattctc-tttttattgtgcaggatga-----tgccgcagagtgtag  
 ACCCTTTTCCCAGGTTGCATCATcatttctctt---ttagcaatagaacaa-----tgccgctgagtgtag  
 ACCCTTTTCCCAGGTTGCATCATcatttctctt---ttagctatagaacaa-----tgccgctgagtgtag  
 ACCCTTTTCCCAGGTTGCATCATcatttctctt---taagcagtaaacag-----tgtcgcagagtgtag  
 AACCTTTTCCCGGTTGCATaattgtttctctt---ccagaagtagaacat-----tgccgctgagtgtag  
 AACCTTTTCCCGGTTGCATaattgtttctctt---ttatcagacagacat-----tgtcgcagagtgtag  
 AACCTTTTCCAGGTTGCATaattgtttctctt---ttatcaaacagacac-----tgccgcagagtgtag  
 ACCCTTTTCCAGGTTGCATgggt-aaatctctt---taatgctgataaacag-----ggctccagagtctaa  
 \* \* \* \* \* \* \* \* \* \* \* \* \* \* \* \* \* \* \* \* \* \* \* \* \* \* \* \* \* \* \* \* \* \* \* \* \* \* \* \* \* \* \*

-35

YdhB binding site -> ydhB

ggagtgcacacctggctt**gttgaa**acgctaattattgtcgaa**tgggttcaaaat**tttgcaggcagatt**ATGTGGTCGAGA**  
 ggagtgcacaaagcggct**gttgaa**acgctaattattgtcgagtgcattcaaaat**tttgcaggcagaac**ATGTGGTCGAGA  
 \*\*\*\*\* \* \*\*\*\*\* \* \* \*\*\*\*\* \* \*\*\*\*\* \* \*\*\*\*\* \* \*\*\*\*\* \* \*\*\*\*\* \*

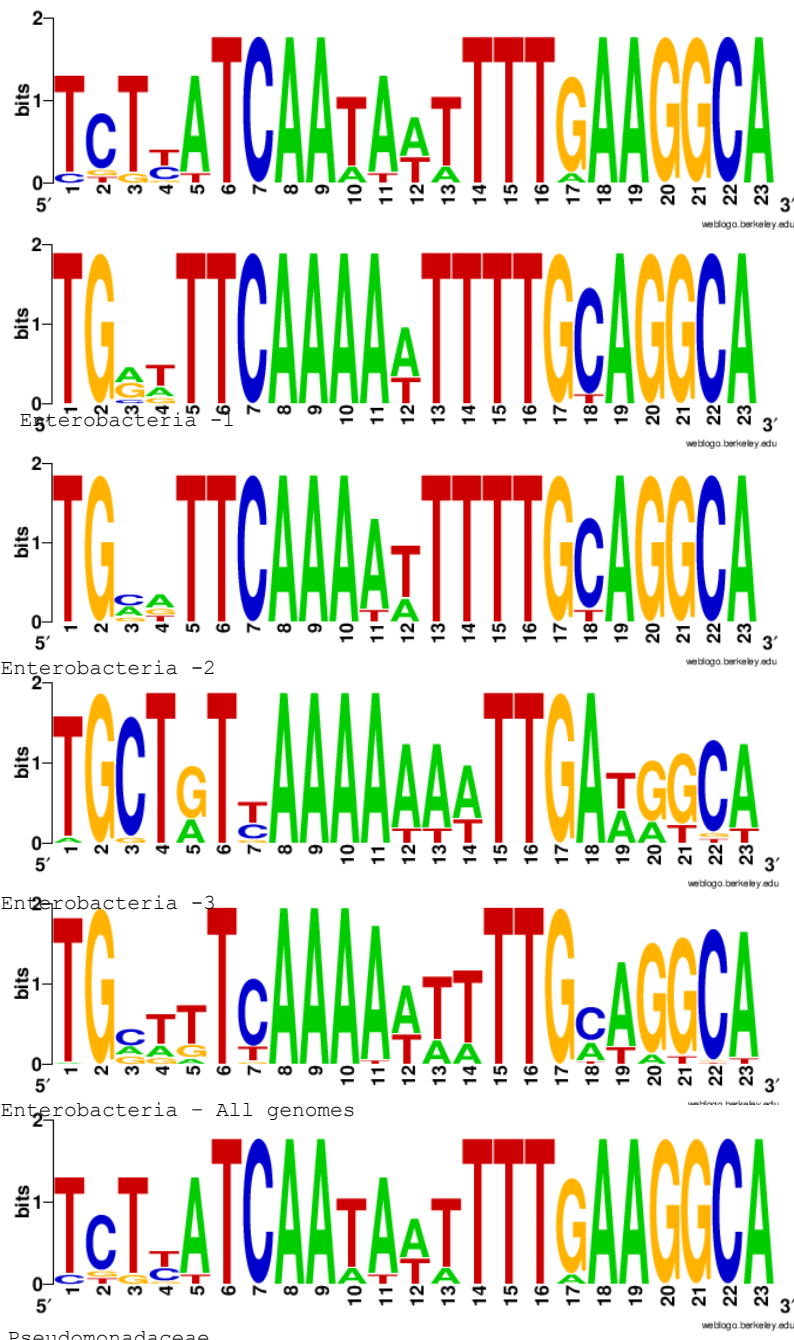



### Enterobacteriaceae - 3

|                    |                                                                  |
|--------------------|------------------------------------------------------------------|
| 630.33.peg.1425    | <i>Yersinia enterocolitica</i> strain ATCC 9610                  |
| 393305.7.peg.2324  | <i>Yersinia enterocolitica</i> subsp. <i>enterocolitica</i> 8081 |
| 349966.5.peg.542   | <i>Yersinia frederiksenii</i> ATCC 33641                         |
| 28152.3.peg.1198   | <i>Yersinia kristensenii</i> strain ATCC 33639                   |
| 349965.6.peg.1196  | <i>Yersinia intermedia</i> ATCC 29909                            |
| 349967.4.peg.1011  | <i>Yersinia mollaretii</i> ATCC 43969                            |
| 527004.3.peg.123   | <i>Yersinia rohdei</i> ATCC 43380                                |
| 349968.5.peg.69    | <i>Yersinia bercovieri</i> ATCC 43970                            |
| 502800.6.peg.2008  | <i>Yersinia pseudotuberculosis</i> YPIII                         |
| 1084234.3.peg.4018 | <i>Yersinia pestis</i> biovar <i>Orientalis</i> str. AS200901509 |
| 29486.45.peg.499   | <i>Yersinia ruckeri</i> strain Big Creek 74                      |
| 291112.3.peg.2119  | <i>Photorhabdus asymbiotica</i>                                  |
| 615.109.peg.2214   | <i>Serratia marcescens</i> strain UCI88                          |
| 768490.3.peg.2144  | <i>Serratia</i> sp. AS12                                         |
| 614.9.peg.259      | <i>Serratia liquefaciens</i> strain FDAARGOS_125                 |
| 667129.3.peg.3101  | <i>Serratia odorifera</i> DSM 4582                               |
| 399741.7.peg.2234  | <i>Serratia proteamaculans</i> 568                               |
| 82996.16.peg.4145  | <i>Serratia plymuthica</i> strain A153                           |
| 47917.12.peg.3337  | <i>Serratia fonticola</i> strain GS2                             |

Pseudomonadaceae

|                    |                                             |
|--------------------|---------------------------------------------|
| 746360.3.peg.1750  | Pseudomonas fluorescens WH6                 |
| 1038924.3.peg.1593 | Pseudomonas fluorescens SS101               |
| 321846.3.peg.1569  | Pseudomonas simiae strain WCS417            |
| 1144885.3.peg.4026 | Pseudomonas sp. R81                         |
| 1037911.3.peg.1617 | Pseudomonas fluorescens A506                |
| 96901.3.peg.1676   | Pseudomonas synxantha BG33R                 |
| 216595.4.peg.1849  | Pseudomonas fluorescens SBW25               |
| 1125977.3.peg.5361 | Pseudomonas sp. PAMC 25886                  |
| 294.123.peg.1588   | Pseudomonas fluorescens strain UK4          |
| 882211.3.peg.4099  | Pseudomonas deceptionensis strain DSM 26521 |
