# Supplementary material for: Identification of a transcription factor, PunR, that regulates the purine and purine nucleoside transporter punC in E. coli
Source: PubMed Central journal article supplement (PMC8376909; doi:10.1038/s42003-021-02516-0), 2021-08-19
Supplement: 42003_2021_2516_MOESM2_ESM.pdf [file 42003_2021_2516_MOESM2_ESM.pdf]

## **Description of Additional Supplementary Files**

**File name:** Supplementary Data 1

**Description:** The punC, add and WT E. coli BW25113 growth raw data file.

**File name:** Supplementary Data 2

**Description:** RNA-Seq measured differentially expressed genes in the presence and absence of 2.5 mM adenosine compared for E. coli MG1655 wild type strain.
